# Supplementary material for: Evidence of surface reconstructions and incorporation of oxygen into the oxide framework on the hydroxylated La2O3{001} surfaceElectronic supplementary information (ESI) available: further calculations and simulations. See http://www.rsc.org/suppdata/cc/b2/b205528g/
Source: Royal Society of Chemistry journal article supplement (doi:10.1039/b205528g), 2002-08-21
Supplement: b205528g.doc [file b205528g.doc]

*Electronic Supplementary Information*

**Evidence of surface reconstructions and incorporation of oxygen into the oxide framework on the hydroxylated La2O3{001} surface**

**Maria Alfredsson1*, C.Richard A. Catlow1, Anastasia Paulidou2 and Roger M. Nix2**

*1 Davy Faraday Research Laboratory, The Royal Institution of Great Britain, 21 Albemarle Street, London W1S 4BS, UK*

*2 Department of Chemistry, Queen Mary, University of London, Mile End Road, London, E1 4NS, UK*

The hydroxalated {001} surfaces of A-La2O3 are investigated, by performing periodic density functional calculations, using the CASTEP program [1], in which the electron charge density is expanded in a plane-wave basis set. The calculations are carried out employing the non-local ultrasoft pseudo-potentials [1,2] available in the CASTEP program. The electronic configurations of the atomic species are La(5*s*2, 5*p*6, 6*s*2, 5*d*1); O(2*s*2, 2*p*4); and H(1*s*1). The radial cut-off (rcut) employed for the different *l*-values (*s*, *p*, *d* and *f*) are constant for a given atomic number, and the rcut values employed in the current study are La=2.30, O=1.30 and H=0.80 eV. Listed in **Table 1** are lattice parameters and total energies for the geometry optimised crystal structure of A-La2O3 as a function of k-point sampling and kinetic energy cut-off (Ecut). We find that within the -point (Ecut=380 eV) the total energy of the system is overestimated by *ca.* 2.9 eV, and the lattice parameters are underestimated compared to both the experimental structure [3] and geometry optimised structures obtained with larger k-point grids. However, owing to the larger computational cell applied in the calculations on the surfaces we partly compensate for the use of a smaller k-point grid, resulting in equivalent surface displacements employing the -point and that of a larger k-point sampling (4x4x1). Furthermore, our investigation shows that that geometries obtained employing an Ecut of 380 eV are comparable to properties calculated with a higher Ecut (450 eV), and total energies are converged within 0.06 eV. Consequently, all surface structures are optimised within the -point employing an Ecut value of 380 eV, but surface energies are not converged within the -point grid, and to obtain more accurate energies and electronic properties single point calculations are undertaken within the larger k-point grid. The adsorption energy of one water molecule on the A-La2O3 surface is 0.63±0.02 eV considering the two Ecut values. Moreover, the ‘density mixing’ method [1] is applied as implemented in the CASTEP code, and for geometry optimisations, we utilise the Broyden-Fletcher-Goldfarb-Shanno (BFGS) [4-7] algorithm.

All calculations have been performed within the Perdew-Wang91 functional (denoted GGA) [8]. Our choice of functional is based on results presented in ref. 9, in which we perform calculations using various Hamiltonians to investigate the properties of the H-bond. In the latter investigation it is found that the GGA functionals provide geometrical structures and H-bond energies in better agreement with experiment than the LDA functional - properties which are crucial to model accurate when we want to study the dissociation process of water.

**Table 1** Total energies and optimised lattice parameters of A-La2O3 (space group No. 164 ) are calculated for different computational settings employing the CASTEP code as described in the text.

| *k-point sampling* | *a*-axis (Å) | *c*-axis (Å) | V (Å3) | Etot (eV) |
| --- | --- | --- | --- | --- |
| ***Ecut=380 eV*** |  |  |  |  |
|  | 3.828 | 6.119 | 77.680. | -3063.8585137 |
| 4x4x2 | 3.993 | 6.161 | 85.089 | -3060.9540913 |
| 6x6x6 | 3.985 | 6.186 | 85.090 | -3060.9509173 |
| 8x8x8 | 3.987 | 6.177 | 85.064 | -3060.9506841 |
| ***Ecut=450 eV*** |  |  |  |  |
| 6x6x6 | 3.994 | 6.202 | 85.673 | -3061.0077672 |
| 8x8x8 | 3.997 | 6.175 | 85.450 | -3061.0059840 |
| ***Expt.* [3]** | 3.937 | 6.130 | 85.285 | - |

The periodic boundary conditions employed by CASTEP require that the surfaces are modelled, as repeated slabs, separated by a ‘pseudo-vacuum’, which leaves us with two parameters to control; the slab and pseudo-vacuum thickness. In the current investigation a pseudo vacuum of ~10Å has been applied, which provides surface relaxations in agreement with a 15Å thick pseudo vacuum. All slabs are modelled with two equivalent surfaces, due to the symmetry; *i.e.* each slab contains a mirror/glide plane in the middle. The {001} surface, as modelled in our calculations, is oxygen terminated and built up of 10-atomic layers, resulting in surfaces displacements which are equivalent to slabs of larger thickness, which is also the case succeeding water adsorption on the oxide surfaces. When depositing the water ad-layer on the oxide surface the following procedure is adopted:

1. First the bulk structures are geometry optimised.
2. Next from the optimised bulk structures we cut out the clean surface.
3. The ideal surfaces are then optimised, keeping cell shape, volume and axes fixed at the optimised bulk parameters.
4. Subsequently, the water molecules are deposited on the optimised oxide surface. The water molecules are deposited on both sides of the slab, keeping the symmetry of the clean slab and the dipole moment of the system to zero.
5. Finally, we optimised the atomic coordinates of the slab+water molecules, allowing cell volume and cell shape to relax.

The *first-principles* Molecular Dynamics (MD) simulations are undertaken with the CASTEP code, employing the same settings as described for the periodic DFT calculations. All calculations are performed within the NVT ensemble at a temperature of 300 K. The total simulation time of the MD simulations are 1 pico-second (ps) in steps of 1 femto-second (fs). Desired temperature (300 K) is constant in the system after *ca.* 0.2 ps, and the MD simulations were continued for another *approx.* 0.8 ps, to ensure that equilibrium was reached in the system. Also in the *first-principles* MD simulations the water molecules are deposited on the two geometry equivalent surfaces to keep the dipole moment of the system to zero.

**Reference List**

[1] M.C. Payne, M.P. Teter, D.C. Allan, T.A. Aris and J.D. Joannopoulos, *Rev. Mod. Phys.*, 1992, **64**, 1045; The Guide 1.1 to CASTEP 3.9, P. Lindan, Daresbury Laboratory, Warrington, UK

[2] D. Vanderbilt, *Phys. Rev. B.*, 1990, **41**, 7892

[3] R.W.G. Wyckoff, Crystal Structures, 2nd ed. Vol. 1, Interscience; (John Wiley & Sons, Inc), New York, (1965)

[4] C.G. Broyden, *J. Inst. Math. Appl.*, 1970, **6**, 76

[5] R. Fletcher, *Comput. J.*, 1970, **13**, 317

[6] D. Goldfarb, *Math. Comp.*, 1970, **24**, 23

[7] D.F. Shanno, *Math. Comp.*, 1970, **24**, 647

[8] J.P. Perdew, J.A. Chevary, S.H. Vosko, K.A. Jackson, M.R. Pederson, D.J. Singh and V. Fiolhais, *Phys. Rev. B*, 1992, **46**, 6671

[9] M. Alfredsson, L. Ojamäe, K.G. Hermansson, *J. Int. Quant. Chem.*, 1996, **60**, 767
